# Supplementary material
Source: Springer Nature journal article supplement (https://www.springermedizin.de/resource/supplementary/12943_2010_637_MOESM5_ESM.pdf/9554456)

**A**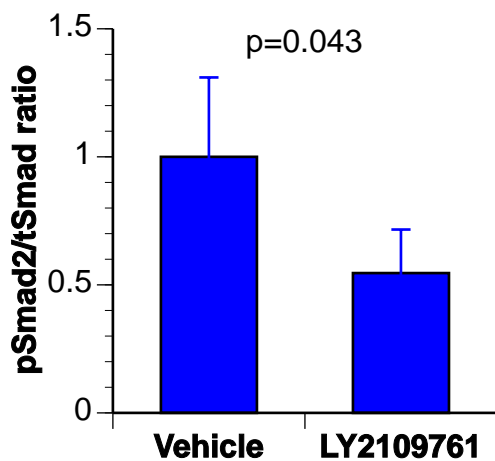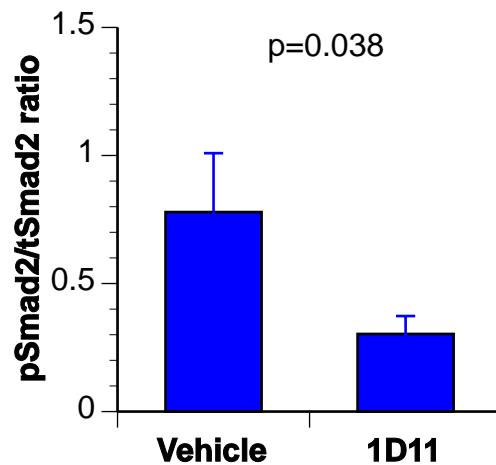**B**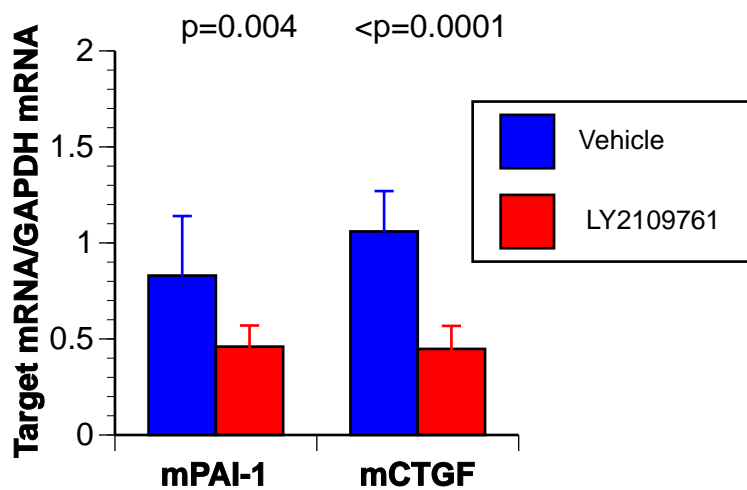**C**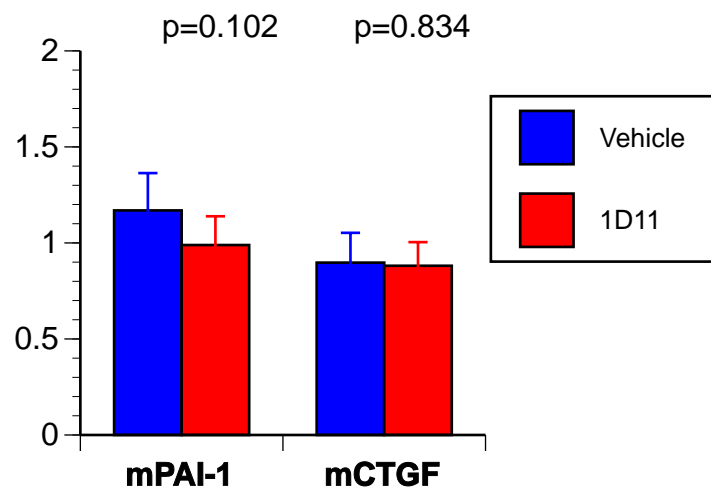

Supplement: MOESM5 [file 9554456]
